# Supplementary material for: Neovascular PSMA expression is a common feature in malignant neoplasms of the thyroid
Source: PubMed Central journal article supplement (PMC5839407; doi:10.18632/oncotarget.23984), 2018-01-04
Supplement: oncotarget-09-9867-s001.pdf [file oncotarget-09-9867-s001.pdf]

## **Neovascular PSMA expression is a common feature in malignant neoplasms of the thyroid**

### **SUPPLEMENTARY MATERIALS**

**Supplementary Table 1: Semi-quantitative immunohistochemistry results. See [Supplementary Table 1](#)**
